# Supplementary material for: 19F-MRS/1H-MRI dual-function probe for detection of β-galactosidase activity
Source: Royal Society of Chemistry journal article supplement (doi:10.1039/c3sc21099e), 2013-01-01
Supplement: c3sc21099e.pdf [file c3sc21099e.pdf]

## Supporting Information

*For*

### **<sup>19</sup>F-MRS/<sup>1</sup>H-MRI Dual-Function Probe for Detection of $\beta$ -Galactosidase Activity**

Jian-Xin Yu,<sup>1\*</sup> Vikram D. Kodibagkar,<sup>2</sup> Li Liu,<sup>3</sup> Zhongwei Zhang,<sup>1</sup>  
Li Liu,<sup>1</sup> Jennifer Magnusson,<sup>1</sup> Yuting Liu<sup>4</sup>

<sup>1</sup> Department of Radiology, The University of Texas Southwestern Medical Center at Dallas, 5323 Harry Hines Blvd., Dallas, Texas 75390-9058, USA.

<sup>2</sup> Currently at School of Biological and Health Systems Engineering, Arizona State University, Tempe, AZ 85287-9709, USA.

<sup>3</sup> Xinjiang Institute of Chemistry and Physics, Chinese Academy of Sciences, 40 Beijing South Road, Urumqi, Xinjiang 830011, China.

<sup>4</sup> Department of Chemistry, Xinjiang University, 14 Victory Road, Urumqi, Xinjiang 830046, China.

#### **CONTENTS:**

1. Supporting figures:

- (1) Figure S1, The illustration of iron chelation therapy.
- (2) Figure S2, The <sup>19</sup>F-MRS/<sup>1</sup>H-MRI and molecular characterization of **4-FCAT** to **4-FCAT/Fe<sup>3+</sup>**.
- (3) Figure S3, <sup>1</sup>H-MRI detection of  $\beta$ -gal activity.
- (4) Figure S4, The cytotoxicity of **MGD-3-FCAT** to wild-type and *lacZ* expressing MCF7 and PC3 cells.
- (5) Figure S5, *In vitro* <sup>1</sup>H-MRI detection of *lacZ* gene expression in PC3-*lacZ* cells

2. Synthesis of ligands.

3. Fe-Complex preparation.

4. Molecular characterization of 3- and 4-FCAT  $\beta$ -D-galactopyranosides.

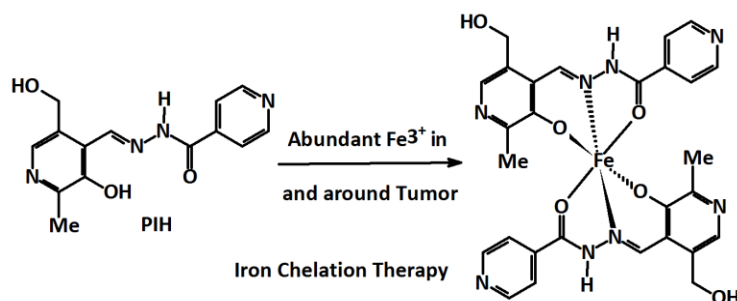

**Figure S1.** The illustration of iron chelation therapy.

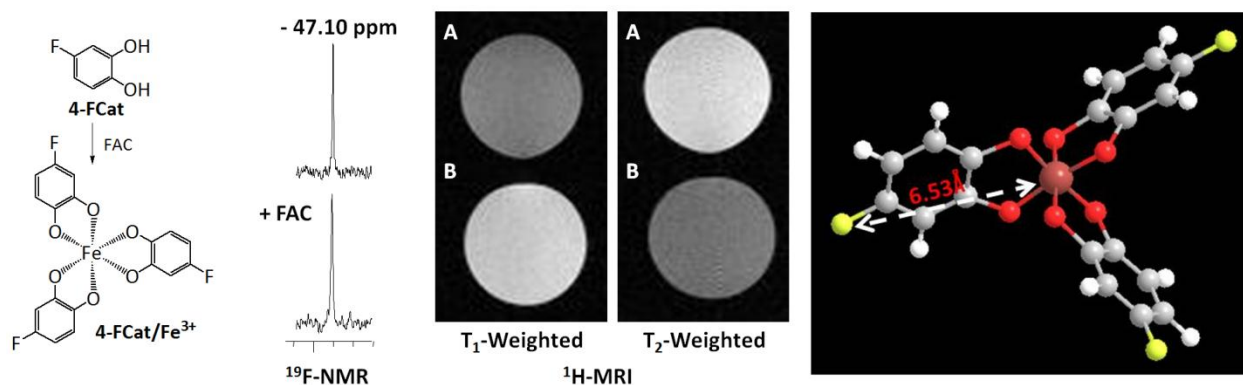

**Figure S2.** The  $^{19}\text{F}$ -MRS/ $^1\text{H}$ -MRI and molecular characterization of **4-FCAT** to **4-FCAT/Fe $^{3+}$** .  $^{19}\text{F}$ -MRS: (1) **4-FCAT** (1.2 mg, 9.0  $\mu\text{mol}$ ) in PBS (0.1 M, pH=7.4, 600  $\mu\text{L}$ ) at 25 $^\circ\text{C}$ ; (2) **4-FCAT** (1.2 mg, 9.0  $\mu\text{mol}$ ) in PBS (0.1 M, pH=7.4, 500  $\mu\text{L}$ ), FAC (796  $\mu\text{g}$ , 3.0  $\mu\text{mol}$ ) in PBS (0.1 M, pH=7.4, 100  $\mu\text{L}$ ) at 25 $^\circ\text{C}$ ,  $^{19}\text{F}$ -NMR: Using the same parameters as in Figure 4.  $^1\text{H}$ -MRI: (A) Control, **4-FCAT** (12.0 mM) in PBS (0.1 M, pH=7.4) at 20-22 $^\circ\text{C}$ ; (B) Complex, **4-FCAT** (12.0 mM), FAC (4.0 mM) in PBS (0.1 M, pH=7.4) at 20-22 $^\circ\text{C}$ ; **Conditions:** (a)  $T_1$ -weighted  $^1\text{H}$ -MRI: Using the same parameters as in Figure 3; (b)  $T_2$ -weighted  $^1\text{H}$ -MRI: Using the same parameters as in Figure 6; **Molecular Modeling Calculation:** Using the same programs as in Figure 4,  $r=6.53$   $\text{\AA}$ .

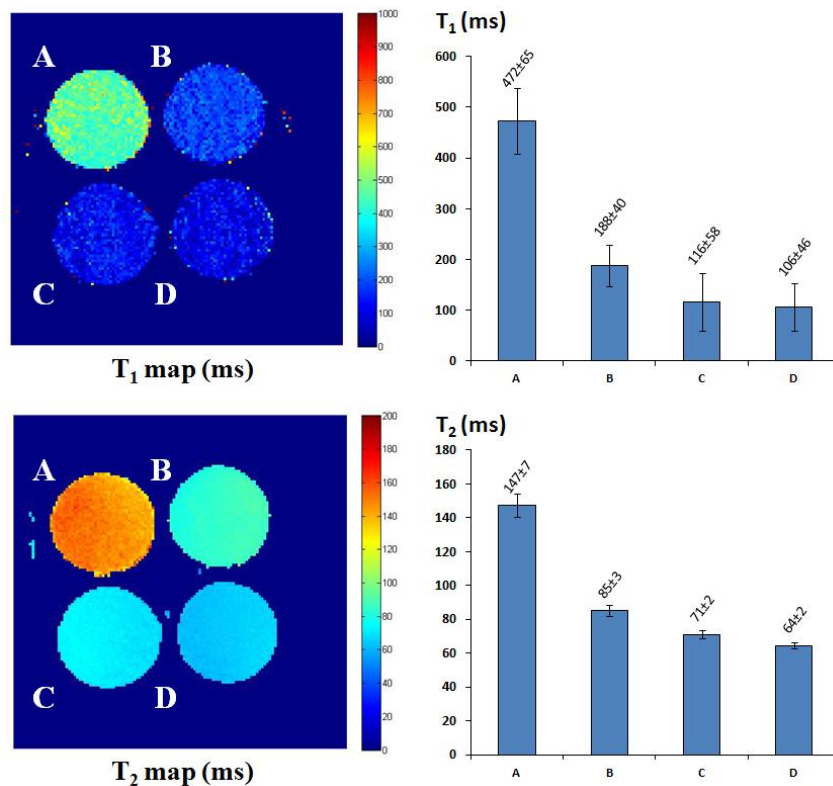

**Figure S3.** <sup>1</sup>H-MRI detection of β-gal activity. **Conditions:** <sup>1</sup>H-MRI, 200 MHz, 1 mm slice, 128x128, 40mmx40mm, T<sub>1</sub>-weighted imaging: TR=500 ms, TE=15 ms; T<sub>2</sub>-weighted imaging: TR=2000 ms, TE=60 ms. **(A)** control, MGD-3-FCAT (3.5 mg, 12.1 μmol), FAC (4.0 μmol), TFA (2.0 μmol), PBS (1.0 mL); **(B)** MGD-3-FCAT (1.2 mg, 4.1 μmol), FAC (4.0 μmol), β-gal (E801A, 10 units), TFA (2.0 μmol), PBS (1.0 mL); **(C)** MGD-3-FCAT (2.4 mg, 8.3 μmol), FAC (4.0 μmol), β-gal (E801A, 10 units), TFA (2.0 μmol), PBS (1.0 mL); **(D)** MGD-3-FCAT (3.5 mg, 12.1 μmol), FAC (4.0 μmol), β-gal (E801A, 10 units), TFA (2.0 μmol), PBS (1.0 mL) at 37°C in 30 mins.

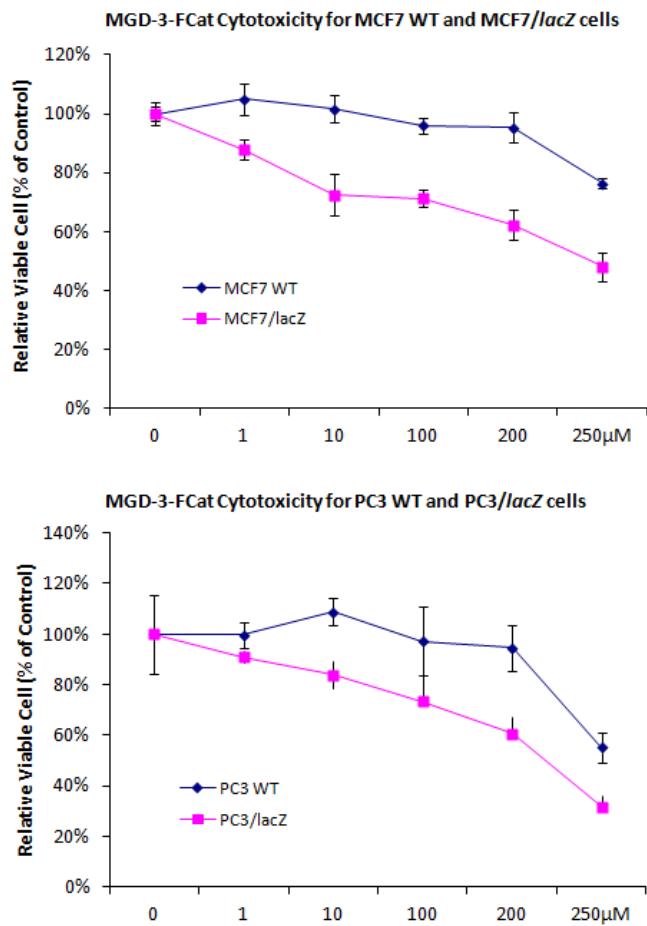

**Figure S4.** The cytotoxicity of MGD-3-FCAT to wild-type and *lacZ* expressing MCF7 and PC3 cells.

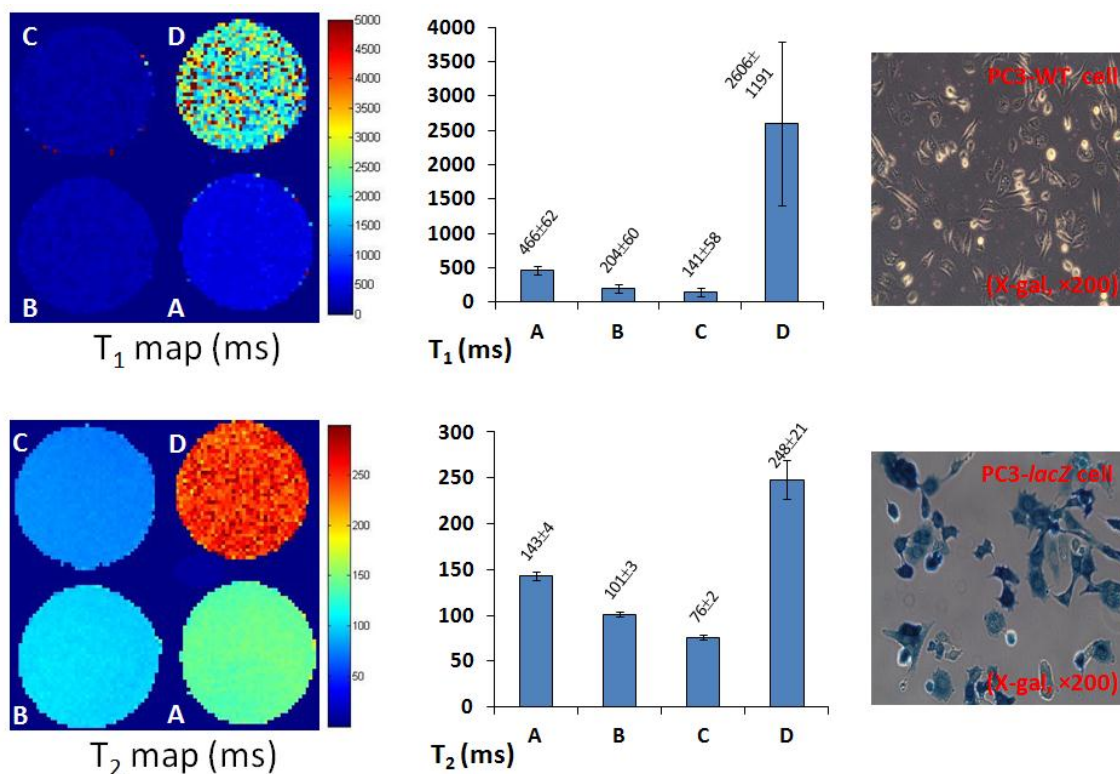

**Figure S5.** *In vitro* <sup>1</sup>H-MRI detection of *lacZ* gene expression in PC3-*lacZ* cells after 25-hour incubation at 37°C. **<sup>1</sup>H-MRI Conditions:** Using the same parameters as in Figure S3. **(A)** control, MGD-3-FCAT (3.5 mg, 12.1 μmol), FAC (4.0 μmol), TFA (2.0 μmol), PC3-WT cells (5×10<sup>6</sup>) in PBS (0.1M, pH=7.4, 800 μL); **(B)** MGD-3-FCAT (3.5 mg, 12.1 μmol), FAC (4.0 μmol), TFA (2.0 μmol), PC3-*lacZ* cells (5×10<sup>6</sup>) in PBS (0.1M, pH=7.4, 800 μL); **(C)** MGD-3-FCAT (7.0 mg, 24.1 μmol), FAC (8.0 μmol), TFA (2.0 μmol), MCF7-*lacZ* cells (1×10<sup>7</sup>) in PBS (0.1M, pH=7.4, 800 μL); **(D)** MGD-3-FCAT (3.5 mg, 12.1 μmol), without FAC, TFA (2.0 μmol), PC3-*lacZ* cells (5×10<sup>6</sup>) in PBS (0.1M, pH=7.4, 800 μL). **Histology:** β-gal activity validation in PC3-*lacZ* cells with deep blue (bottom) and no activity in PC3-WT cells (top), X-gal staining (×200).

**Synthesis of Ligands.** *General procedure* - A solution of aldehyde (2.50 mmol) in anhydrous EtOH (15 mL) containing AcOH (20  $\mu$ L) was stirred vigorously with aroylhydrazide (2.50 mmol) at 80°C under N<sub>2</sub> until TLC showed the reaction was completed, then coevaporated with toluene to dryness *in vacuo.*, and crystallized from EtOH-H<sub>2</sub>O.

Pyridoxal isonicotinoylhydrazone (**PIH**), 644 mg, white crystals,  $\delta_{\text{H}}$ : 12.39, 11.47 (2 H, 2br, 2-OH & NH), 9.10 (1 H, s, CH=N), 8.83 (2 H, d,  $J_{2',3'} = J_{5',6'} = 4.0$  Hz, H-3',5'), 7.97 (1H, s, H-6), 7.88 (2 H, d, H-2',6'), 5.43 (1 H, t,  $J_{\text{H-5},\text{HO-5}} = 4.0$  Hz,  $\alpha^5$ -OH), 4.62 (2 H, d, CH<sub>2</sub>-5), 3.34 (3H, s, CH<sub>3</sub>-2) ppm;  $\delta_{\text{C}}$ : 161.55 (s, PyCO), 150.70 ~ 120.03 (m, CH=N, Ar-C), 58.92 (s, CH<sub>2</sub>-5), 18.86 (s, CH<sub>3</sub>-2) ppm.

Anal. Calcd. for C<sub>14</sub>H<sub>14</sub>N<sub>4</sub>O<sub>3</sub> (%): C, 58.74, H, 4.93, N, 19.57; Found: C, 58.70, H, 4.91, N, 19.56.

Salicylaldehyde benzoylhydrazone (**SBH**), 570 mg, white needles,  $\delta_{\text{H}}$ : 12.14, 11.34 (2 H, 2br, OH & NH), 8.67 (1 H, s, CH=N), 7.97 ~ 6.92 (9H, m, Ar-H) ppm;  $\delta_{\text{C}}$ : 162.83 (PhCO), 157.48 ~ 116.42 (CH=N, Ar-C) ppm.

Anal. Calcd. for C<sub>14</sub>H<sub>12</sub>N<sub>2</sub>O<sub>2</sub> (%): C, 69.99, H, 5.03, N, 11.66; Found: C, 69.97, H, 5.01, N, 11.63.

Salicylaldehyde isonicotinoylhydrazone (**SIH**), 567 mg, white crystals,  $\delta_{\text{H}}$ : 12.32, 11.13 (2 H, 2br, OH & NH), 8.83 (1 H, s, CH=N), 8.71 ~ 6.93 (8H, m, Ar-H) ppm;  $\delta_{\text{C}}$ : 161.33 (PyCO), 157.48 ~ 116.44 (CH=N, Ar-C) ppm.

Anal. Calcd. for  $C_{13}H_{11}N_3O_2$  (%): C, 64.72, H, 4.60, N, 17.42; Found: C, 64.70, H, 4.57, N, 17.40.

Salicylaldehyde nicotinoylhydrazone (**SNH**), 579 mg, light yellow crystals,  $\delta_H$ : 12.28, 11.19 (2 H, 2br, OH & NH), 9.13 (1 H, s, CH=N), 8.80 ~ 6.92 (8H, m, Ar-H) ppm;  $\delta_C$ : 161.43 (PyCO), 157.46 ~ 116.43 (CH=N, Ar-C) ppm.

Anal. Calcd. for  $C_{13}H_{11}N_3O_2$  (%): C, 64.72, H, 4.60, N, 17.42; Found: C, 64.69, H, 4.58, N, 17.39.

2-Hydroxyl-5-fluorobenzaldehyde benzoylhydrazone (**p-FSBH**), 581 mg, white crystals,  $\delta_H$ : 12.17, 11.07 (2 H, 2br, 2-OH & NH), 8.65 (1 H, s, CH=N), 7.97 ~ 6.93 (8H, m, Ar-H) ppm;  $\delta_C$ : 162.97 (s, PhCO), 156.51 ~ 113.82 (m, CH=N, Ar-C) ppm.

Anal. Calcd. for  $C_{14}H_{11}N_2O_2F$  (%): C, 65.11, H, 4.29, N, 10.85; Found: C, 65.08, H, 4.27, N, 10.83.

2-Hydroxyl-benzaldehyde 4-fluorobenzoylhydrazone (**SBHF-p**), 601 mg, white needles,  $\delta_H$ : 12.14, 11.29 (2 H, 2s, 2-OH & NH), 8.65 (1 H, s, CH=N), 8.06 ~ 6.90 (8H, m, Ar-H) ppm;  $\delta_C$ : 165.54 (s, PhCO), 163.05 ~ 115.45 (m, CH=N, Ar-C) ppm.

Anal. Calcd. for  $C_{14}H_{11}N_2O_2F$  (%): C, 65.11, H, 4.29, N, 10.85; Found: C, 65.09, H, 4.26, N, 10.82.

**Fe-Complex Preparation.** *General procedure* - To a solution of ligand (2.0 mmol for PIH, SBH, SIH, SNH, *p*-FSBH and SBHF-*p*; 3.0 mmol for 3-FCAT and 4-FCAT) and Et<sub>3</sub>N (323 mg, 3.2 mmol) in anhydrous MeOH (100 mL) was added dropwise a solution of Fe(ClO<sub>4</sub>)<sub>3</sub>·6H<sub>2</sub>O (460 mg, 1.0 mmol) in anhydrous MeOH (50 mL) with stirring at gently refluxing under N<sub>2</sub> for 30 min. Upon cooling, a fine black precipitate was obtained, which was filtered off, washed with EtOH then Et<sub>2</sub>O, and dried in the vacuum.

**PIH/Fe<sup>3+</sup> Complex**, [Fe(PIH-H)<sub>2</sub>](ClO<sub>4</sub>)·3H<sub>2</sub>O (576 mg) as black powders. Anal. Calcd. for C<sub>28</sub>H<sub>32</sub>ClFeN<sub>8</sub>O<sub>13</sub> (%): C, 43.12, H, 4.14, N, 14.37; Found: C, 43.08, H, 4.09, N, 14.32.

**SBH/Fe<sup>3+</sup> Complex**, [Fe(SBH-H)<sub>2</sub>](ClO<sub>4</sub>)·3H<sub>2</sub>O (770 mg) as black powders. Anal. Calcd. for C<sub>28</sub>H<sub>28</sub>ClFeN<sub>4</sub>O<sub>11</sub> (%): C, 48.89, H, 4.10, N, 8.15; Found: C, 48.81, H, 4.03, N, 8.07.

**SIH/Fe<sup>3+</sup> Complex**, [Fe(SIH-H)<sub>2</sub>](ClO<sub>4</sub>)·3H<sub>2</sub>O (635 mg) as black powders. Anal. Calcd. for C<sub>26</sub>H<sub>26</sub>ClFeN<sub>6</sub>O<sub>11</sub> (%): C, 45.27, H, 3.80, N, 12.18; Found: C, 45.18, H, 3.73, N, 12.11.

**SNH/Fe<sup>3+</sup> Complex**, [Fe(SNH-H)<sub>2</sub>](ClO<sub>4</sub>)·3H<sub>2</sub>O (717 mg) as black powders. Anal. Calcd. for C<sub>26</sub>H<sub>26</sub>ClFeN<sub>6</sub>O<sub>11</sub> (%): C, 45.27, H, 3.80, N, 12.18; Found: C, 45.21, H, 3.71, N, 12.13.

***p*-FSBH/Fe<sup>3+</sup> Complex**, [Fe(*p*-FSBH-H)<sub>2</sub>](ClO<sub>4</sub>)·3H<sub>2</sub>O (594 mg) as black powders. Anal. Calcd. for C<sub>28</sub>H<sub>26</sub>ClFeN<sub>4</sub>O<sub>11</sub>F<sub>2</sub> (%): C, 46.46, H, 3.62, N, 7.74; Found: C, 46.39, H, 3.54, N, 7.63.



**SBHF-*p*/Fe<sup>3+</sup>** Complex, [Fe(SBHF-*p*-H)<sub>2</sub>](ClO<sub>4</sub>)·3H<sub>2</sub>O (695 mg) as black powders. Anal. Calcd. for C<sub>28</sub>H<sub>26</sub>ClFeN<sub>4</sub>O<sub>11</sub>F<sub>2</sub> (%): C, 46.46, H, 3.62, N, 7.74; Found: C, 46.41, H, 3.52, N, 7.65.

**3-FCAT/Fe<sup>3+</sup>** Complex, (Et<sub>3</sub>NH)<sub>3</sub>[Fe(3-FCAT-2H)<sub>3</sub>]·H<sub>2</sub>O (392 mg) as black powders. Anal. Calcd. for C<sub>36</sub>H<sub>69</sub>FeN<sub>3</sub>O<sub>7</sub>F<sub>3</sub> (%): C, 56.24, H, 9.05, N, 5.47; Found: C, 56.16, H, 8.95, N, 5.41.

**4-FCAT/Fe<sup>3+</sup>** Complex, (Et<sub>3</sub>NH)<sub>3</sub>[Fe(4-FCAT-2H)<sub>3</sub>]·H<sub>2</sub>O (484 mg) as black powders. Anal. Calcd. for C<sub>36</sub>H<sub>69</sub>FeN<sub>3</sub>O<sub>7</sub>F<sub>3</sub> (%): C, 56.24, H, 9.05, N, 5.47; Found: C, 56.18, H, 8.99, N, 5.42.

### Molecular Characterization of 3- and 4-FCAT β-*D*-Galactopyranosides.

1-*O*-(2', 3', 4', 6'-tetra-*O*-acetyl-β-*D*-galactopyranosyl)-3-fluorocatechol **MG-3-FCAT** (1.09 g, 95%), R<sub>f</sub> 0.45 (3:2 cyclohexane-EtOAc), δ<sub>H</sub> (CDCl<sub>3</sub>, 400MHz): 6.54 (1 H, t, <sup>3</sup>J<sub>F<sub>3</sub>,H<sub>4</sub></sub> = J<sub>4,5</sub> = 12.0 Hz, H-4), 6.91 (1 H, dd, J<sub>5,6</sub> = 8.0 Hz, J<sub>4,5</sub> = 12 Hz, H-5), 6.65 (1 H, d, J<sub>5,6</sub> = 8.0 Hz, H-6), 6.79 (1 H, s, HO-2, exchangeable with D<sub>2</sub>O), 4.74 (1 H, d, J<sub>1',2'</sub> = 8.0 Hz, H-1'), 5.40 (1 H, dd, J<sub>2',3'</sub> = 10.2 Hz, H-2'), 5.03 (1 H, dd, J<sub>3',4'</sub> = 4.0 Hz, H-3'), 5.35 (1 H, d, J<sub>4',5'</sub> = 3.6 Hz, H-4'), 3.99 (1 H, m, H-5'), 4.14 (1 H, dd, J<sub>5',6a'</sub> = 7.8 Hz, J<sub>6a',6b'</sub> = 12.0 Hz, H-6a'), 4.08 (1 H, dd, J<sub>5',6b'</sub> = 3.7 Hz, H-6b'), 2.12, 2.06, 1.96, 1.92 (12 H, 4s, 4 × CH<sub>3</sub>CO) ppm; δ<sub>C</sub> (CDCl<sub>3</sub>, 100MHz): 170.43, 170.15, 169.97, 169.76 (4 × CH<sub>3</sub>CO), 125.95 (d, <sup>3</sup>J<sub>F-C</sub> = 9.0 Hz, C-1), 107.50 (d, <sup>2</sup>J<sub>F-C</sub> = 19.0 Hz, C-2), 155.37 (d, <sup>1</sup>J<sub>F-C</sub> = 245.0 Hz, C-3), 132.80 (d, <sup>2</sup>J<sub>F-C</sub> = 13.0 Hz, C-4), 150.96 (C-5), 112.38 (d, <sup>3</sup>J<sub>F-C</sub> = 3.0 Hz, C-6), 104.16 (C-1'), 68.34 (C-2'),

70.37 (C-3'), 66.77 (C-4'), 71.66 (C-5'), 61.11 (C-6'), 20.67, 20.51, 20.41, 20.26 (4 × CH<sub>3</sub>CO) ppm.

Anal. Calcd. for C<sub>20</sub>H<sub>23</sub>O<sub>11</sub>F (%): C, 52.40, H, 5.06; Found: C, 52.38, H, 5.04.

2-O-(2', 3', 4', 6'-tetra-O-acetyl-β-D-galactopyranosyl)-4-fluorocatechol **MG-4-FCAT** (1.01 g, 88%), R<sub>f</sub> 0.56 (1:1 cyclohexane-EtOAc), δ<sub>H</sub> (CDCl<sub>3</sub>, 400MHz): 6.77 (1 H, dd, <sup>3</sup>J<sub>F<sub>4</sub>,H<sub>3</sub> = 12.0, J<sub>3,5</sub> = 3.8 Hz, H-3), 6.71 (1 H, dd, J<sub>5,6</sub> = 4.0 Hz, <sup>3</sup>J<sub>F<sub>4</sub>,H<sub>5</sub> = 12.0, H-5), 6.87 (1 H, dd, <sup>4</sup>J<sub>F<sub>4</sub>,H<sub>6</sub> = 8.0 Hz, H-6), 5.77 (1 H, s, HO-1, exchangeable with D<sub>2</sub>O), 4.94 (1 H, d, J<sub>1',2'</sub> = 8.0 Hz, H-1'), 5.46 (1 H, dd, J<sub>2',3'</sub> = 10.4 Hz, H-2'), 5.14 (1 H, dd, J<sub>3',4'</sub> = 3.2 Hz, H-3'), 5.45 (1 H, d, J<sub>4',5'</sub> = 2.8 Hz, H-4'), 4.11 (1 H, m, H-5'), 4.14 (1 H, dd, J<sub>5',6a'</sub> = 7.6 Hz, J<sub>6a',6b'</sub> = 11.2 Hz, H-6a'), 4.08 (1 H, dd, J<sub>5',6b'</sub> = 5.6 Hz, H-6b'), 2.20, 2.16, 2.10, 2.06 (12 H, 4s, 4 × CH<sub>3</sub>CO) ppm; δ<sub>C</sub> (CDCl<sub>3</sub>, 100MHz): 170.57, 170.27, 170.10, 169.86 (4 × CH<sub>3</sub>CO), 143.31 (C-1), 116.21 (d, <sup>3</sup>J<sub>F-C</sub> = 9.0 Hz, C-2), 104.83 (d, <sup>2</sup>J<sub>F-C</sub> = 26.8 Hz, C-3), 156.12 (d, <sup>1</sup>J<sub>F-C</sub> = 248.0 Hz, C-4), 110.95 (d, <sup>2</sup>J<sub>F-C</sub> = 22.4 Hz, C-5), 144.06 (d, <sup>3</sup>J<sub>F-C</sub> = 10.4 Hz, C-6), 101.61 (C-1'), 69.10 (C-2'), 70.47 (C-3'), 66.87 (C-4'), 71.67 (C-5'), 61.54 (C-6'), 21.00, 20.74, 20.70, 20.67 (4 × CH<sub>3</sub>CO) ppm.</sub></sub></sub>

Anal. Calcd. for C<sub>20</sub>H<sub>23</sub>O<sub>11</sub>F (%): C, 52.40, H, 5.06; Found: C, 52.37, H, 5.03.

1-O-(β-D-galactopyranosyl)-3-fluorocatechol **MGD-3-FCAT** (577.46 mg, 96%), R<sub>f</sub> 0.40 (1:2 EtOAc-MeOH), δ<sub>H</sub> (DMSO-*d*<sub>6</sub>, 400MHz): 6.69 (1 H, dd, <sup>3</sup>J<sub>F<sub>3</sub>,H<sub>4</sub> = 10.0 Hz, J<sub>4,5</sub> = 3.6 Hz, H-4), 6.95 (1 H, ddd, <sup>4</sup>J<sub>F<sub>3</sub>,H<sub>5</sub> = 10.0 Hz, J<sub>5,6</sub> = 6.8 Hz, H-5), 6.65 (1 H, d, H-6), 7.32 (1 H, s, HO-2, exchangeable with D<sub>2</sub>O), 4.62 (1 H, d, J<sub>1',2'</sub> = 8.0 Hz, H-1'), 4.58 - 3.64 (4H, br, HO-2', 3', 4', 6', exchangeable with D<sub>2</sub>O), 3.63 (1 H, dd, J<sub>2',3'</sub> = 9.8 Hz, H-2'), 3.67 (1 H, dd, J<sub>3',4'</sub></sub></sub>

= 2.8 Hz, H-3'), 3.38 (1 H, d,  $J_{4',5'} = 3.2$  Hz, H-4'), 3.57 (1 H, m, H-5'), 3.45 (1 H, dd,  $J_{5',6a'} = 6.8$  Hz,  $J_{6a',6b'} = 11.2$  Hz, H-6a'), 3.41 (1 H, dd,  $J_{5',6b'} = 2.8$  Hz, H-6b') ppm;  $\delta_C$  (DMSO- $d_6$ , 100MHz): 124.80 (d,  $^3J_{F-C} = 8.9$  Hz, C-1), 106.76 (d,  $^2J_{F-C} = 19.3$  Hz, C-2), 155.70 (d,  $^1J_{F-C} = 244.1$  Hz, C-3), 132.99 (d,  $^2J_{F-C} = 13.4$  Hz, C-4), 151.82 (d,  $^3J_{F-C} = 3.8$  Hz, C-5), 112.61 (C-6), 105.75 (C-1'), 71.32 (C-2'), 73.06 (C-3'), 68.01 (C-4'), 75.75 (C-5'), 60.11 (C-6') ppm.

Anal. Calcd. for  $C_{12}H_{15}O_7F$  (%): C, 49.66, H, 5.21; Found: C, 49.62, H, 5.18.

2-O-( $\beta$ -D-galactopyranosyl)-4-fluorocatechol **MGD-4-FCAT** (565.43 mg, 94%),  $R_f$  0.43 (1:2 EtOAc-MeOH),  $\delta_H$  (DMSO- $d_6$ , 400MHz): 6.77 (1 H, dd,  $^3J_{F4,H3} = 8.8$  Hz,  $J_{3,5} = 6.0$  Hz, H-3), 6.66 (1 H, ddd,  $^3J_{F4,H5} = 30.0$  Hz,  $J_{5,6} = 8.4$  Hz, H-5), 6.95 (1 H, dd,  $^4J_{F4,H6} = 2.8$  Hz, H-6), 7.30 (1 H, s, HO-1, exchangeable with  $D_2O$ ), 4.67 (1 H, d,  $J_{1',2'} = 8.0$  Hz, H-1'), 4.88 - 3.65 (4H, br, HO-2', 3', 4', 6', exchangeable with  $D_2O$ ), 3.58 (1 H, dd,  $J_{2',3'} = 10.2$  Hz, H-2'), 3.41 (1 H, dd,  $J_{3',4'} = 3.2$  Hz, H-3'), 3.68 (1 H, d,  $J_{4',5'} = 3.2$  Hz, H-4'), 3.53 - 3.48 (3 H, m, H-5', H-6') ppm;  $\delta_C$  (DMSO- $d_6$ , 100MHz): 143.27 (d,  $^4J_{F-C} = 2.2$  Hz, C-1), 115.90 (d,  $^3J_{F-C} = 9.7$  Hz, C-2), 104.23 (d,  $^2J_{F-C} = 23.0$  Hz, C-3), 155.19 (d,  $^1J_{F-C} = 232.9$  Hz, C-4), 108.25 (d,  $^2J_{F-C} = 21.6$  Hz, C-5), 145.73 (d,  $^3J_{F-C} = 11.2$  Hz, C-6), 102.68 (C-1'), 70.40 (C-2'), 72.65 (C-3'), 68.27 (C-4'), 75.90 (C-5'), 60.62 (C-6') ppm.

Anal. Calcd. for  $C_{12}H_{15}O_7F$  (%): C, 49.66, H, 5.21; Found: C, 49.64, H, 5.19.

1,2-di-O-(2', 3', 4', 6'-tetra-O-acetyl- $\beta$ -D-galactopyranosyl)-3-fluorocatechol **FG-3-FCAT** (1.83 g, 93%),  $R_f$  0.35 (1:1 cyclohexane-EtOAc),  $\delta_H$  ( $CDCl_3$ , 400MHz): 6.63 (1 H, ddd,  $^3J_{F3,H4} = 12.0$  Hz,  $J_{4,5} = 8.0$  Hz,  $J_{4,6} = 4.0$  Hz, H-4), 6.98 (1 H, dd,  $J_{5,6} = 12.0$  Hz, H-5), 6.74 (1 H, d, H-6), 4.80 (2 H, d,  $J_{1',2'} = J_{1'',2''} = 8.0$  Hz, H-1', 1''), 5.50 (2 H, dd,  $J_{2',3'} = J_{2'',3''} = 10.2$

Hz, H-2', 2''), 5.09 (2 H, dd,  $J_{3',4'} = J_{3'',4''} = 4.0$  Hz, H-3', 3''), 5.43 (2 H, d,  $J_{4',5'} = J_{4'',5''} = 4.0$  Hz, H-4', 4''), 4.04 (2 H, t,  $J_{5',6a'} = J_{5'',6a''} = 8.0$  Hz, H-5', 5''), 4.22 (2 H, dd,  $J_{6a',6b'} = J_{6a'',6b''} = 12.0$  Hz, H-6a', 6a''), 4.16 (2 H, dd,  $J_{5',6b'} = J_{5'',6b''} = 4.0$  Hz, H-6b', 6b''), 2.20, 2.15, 2.05, 2.03 (24 H, 4s, 8 × CH<sub>3</sub>CO) ppm;  $\delta_C$  (CDCl<sub>3</sub>, 100MHz): 170.43, 170.25, 170.15, 170.03, 169.98, 169.77, 169.49, 169.42 (8 × CH<sub>3</sub>CO), 125.97 (d,  $^3J_{F-C} = 10.0$  Hz, C-1), 107.53 (d,  $^2J_{F-C} = 19.0$  Hz, C-2), 155.37 (d,  $^1J_{F-C} = 245.0$  Hz, C-3), 132.80 (d,  $^2J_{F-C} = 14.0$  Hz, C-4), 150.95 (C-5), 112.37 (d,  $^3J_{F-C} = 3.0$  Hz, C-6), 101.42 (C-1'), 100.40 (C-1''), 68.33 (C-2', 2''), 70.37 (C-3', 3''), 67.02 (C-4'), 66.76 (C-4''), 71.66 (C-5', 5''), 61.26 (C-6'), 61.11 (C-6''), 20.92, 20.83, 20.70, 20.64, 20.53, 20.51, 20.45, 20.44 (8 × CH<sub>3</sub>CO) ppm; ESIMS:  $m/z$  789 [M<sup>+</sup>] (17%), 790 [M+1] (9%).

Anal. Calcd. for C<sub>34</sub>H<sub>41</sub>O<sub>20</sub>F (%): C, 51.78, H, 5.24; Found: C, 51.74, H, 5.21.

1,2-di-O-(2', 3', 4', 6'-tetra-O-acetyl- $\beta$ -D-galactopyranosyl)-4-fluorocatechol **FG-4-FCAT** (1.69 g, 86%), R<sub>f</sub> 0.42 (1:1 cyclohexane-EtOAc),  $\delta_H$  (CDCl<sub>3</sub>, 400MHz): 6.76 (1 H, dd,  $^3J_{F4,H3} = 12.0$  Hz,  $J_{3,5} = 4.0$  Hz, H-3), 6.73 (1 H, ddd,  $^3J_{F4,H5} = 30.0$  Hz,  $J_{5,6} = 8.0$  Hz, H-5), 6.88 (1 H, dd,  $^4J_{F4,H6} = 9.0$  Hz, H-6), 4.85 (1 H, d,  $J_{1',2'} = 8.0$  Hz, H-1'), 4.94 (1 H, d,  $J_{1'',2''} = 8.0$  Hz, H-1''), 5.48 (2 H, dd,  $J_{2',3'} = J_{2'',3''} = 10.0$  Hz, H-2', 2''), 5.12 (1 H, dd,  $J_{3',4'} = 4.0$  Hz, H-3'), 5.15 (1 H, dd,  $J_{3'',4''} = 4.0$  Hz, H-3''), 5.45 (2 H, d,  $J_{4',5'} = J_{4'',5''} = 4.0$  Hz, H-4', 4''), 4.06 (2 H, t,  $J_{5',6a'} = J_{5'',6a''} = 7.6$  Hz, H-5', 5''), 4.24 (2 H, dd,  $J_{6a',6b'} = J_{6a'',6b''} = 11.8$  Hz, H-6a', 6a''), 4.19 (2 H, dd,  $J_{5',6b'} = J_{5'',6b''} = 3.8$  Hz, H-6b', 6b''), 2.20, 2.14, 2.13, 2.09, 2.07, 2.05, 2.03, 2.02 (24 H, 8s, 8 × CH<sub>3</sub>CO) ppm;  $\delta_C$  (CDCl<sub>3</sub>, 100MHz): 170.64, 170.62, 170.60, 170.34, 170.18, 169.79, 169.59, 169.52 (8 × CH<sub>3</sub>CO), 143.34 (d,  $^4J_{F-C} = 2.9$  Hz, C-1), 116.26 (d,  $^3J_{F-C} = 9.0$  Hz, C-2), 104.86 (d,  $^2J_{F-C} = 26.0$  Hz, C-3), 156.19 (d,  $^1J_{F-C} = 238.0$  Hz, C-4), 110.98 (d,  $^2J_{F-C}$

= 22.3 Hz, C-5), 144.09 (d,  $^3J_{F-C} = 10.4$  Hz, C-6), 101.62 (C-1'), 102.85 (C-1''), 69.13 (C-2', 2''), 70.50 (C-3'), 70.61 (C-3''), 66.88 (C-4'), 66.90 (C-4''), 71.61 (C-5'), 71.70 (C-5''), 61.37 (C-6'), 61.58 (C-6''), 21.02, 20.77, 20.73, 20.70 (8 × CH<sub>3</sub>CO) ppm; ESIMS: *m/z* 789 [M<sup>+</sup>] (25%), 790 [M+1] (11%).

Anal. Calcd. for C<sub>34</sub>H<sub>41</sub>O<sub>20</sub>F (%): C, 51.78, H, 5.24; Found: C, 51.75, H, 5.20.

1,2-di-*O*-(β-*D*-galactopyranosyl)-3-fluorocatechol **FGD-3-FCAT** (774.36 mg, 90%), *R<sub>f</sub>* 0.37 (1:4 EtOAc-MeOH), δ<sub>H</sub> (DMSO-*d*<sub>6</sub>, 400MHz): 6.92 (1 H, dd,  $^3J_{F3,H4} = 9.1$  Hz,  $J_{4,5} = 3.8$  Hz, H-4), 7.06 (1 H, ddd,  $^4J_{F3,H5} = 4.0$  Hz,  $J_{5,6} = 8.2$  Hz, H-5), 6.88 (1 H, d, H-6), 5.34 (2 H, d,  $J = 4.0$  Hz, HO-2', 2'', exchangeable with D<sub>2</sub>O), 4.34 (2 H, br, HO-3', 3'', exchangeable with D<sub>2</sub>O), 4.90 (2 H, br, HO-4', 4'', exchangeable with D<sub>2</sub>O), 4.55 (2 H, br, HO-6', 6'', exchangeable with D<sub>2</sub>O), 4.83 (1 H, d,  $J_{1',2'} = 8.0$  Hz, H-1'), 4.69 (1 H, d,  $J_{1'',2''} = 8.0$  Hz, H-1''), 3.69 (1 H, dd,  $J_{2',3'} = 10.2$  Hz, H-2'), 3.71 (1 H, dd,  $J_{2'',3''} = 10.0$  Hz, H-2''), 3.38 (1 H, dd,  $J_{3',4'} = 3.2$  Hz, H-3'), 3.42 (1 H, dd,  $J_{3'',4''} = 3.6$  Hz, H-3''), 3.58 (2 H, m, H-4', 4''), 3.33 (2 H, m, H-5', 5''), 3.54 (4 H, m, H-6', 6'') ppm; δ<sub>C</sub> (DMSO-*d*<sub>6</sub>, 100MHz): 124.94 (d,  $^3J_{F-C} = 9.0$  Hz, C-1), 110.86 (d,  $^2J_{F-C} = 20.0$  Hz, C-2), 156.99 (d,  $^1J_{F-C} = 245.0$  Hz, C-3), 135.34 (d,  $^2J_{F-C} = 13.0$  Hz, C-4), 152.37 (d,  $^3J_{F-C} = 4.0$  Hz, C-5), 113.80 (C-6), 104.95 (C-1'), 103.57 (C-1''), 72.33 (C-2'), 71.59 (C-2''), 74.19 (C-3'), 73.64 (C-3''), 69.37 (C-4'), 69.30 (C-4''), 76.42 (C-5'), 76.13 (C-5''), 61.67 (C-6'), 61.17 (C-6'') ppm.

Anal. Calcd. for C<sub>18</sub>H<sub>25</sub>O<sub>12</sub>F (%): C, 47.79, H, 5.57; Found: C, 47.74, H, 5.53.

1,2-di-*O*-(β-*D*-galactopyranosyl)-4-fluorocatechol **FGD-4-FCAT** (731.34 mg, 85%), *R<sub>f</sub>* 0.42 (1:4 EtOAc-MeOH), δ<sub>H</sub> (DMSO-*d*<sub>6</sub>, 400MHz): 6.77 (1 H, dd,  $^3J_{F4,H3} = 8.8$  Hz,  $J_{3,5} = 5.6$

Hz, H-3), 6.67 (1 H, ddd,  $^3J_{F4,H5} = 26.4$  Hz,  $J_{5,6} = 8.4$  Hz, H-5), 6.95 (1 H, dd,  $^4J_{F4,H6} = 3.2$  Hz, H-6), 5.90 - 5.10 (8H, br, HO-2', 2'', 3', 3'', 4', 4'', 6', 6'', exchangeable with D<sub>2</sub>O), 4.53 (1 H, d,  $J_{1',2'} = 7.6$  Hz, H-1'), 4.67 (1 H, d,  $J_{1'',2''} = 7.6$  Hz, H-1''), 3.62 (2 H, dd,  $J_{2',3'} = J_{2'',3''} = 10.0$  Hz, H-2', 2''), 3.42 (2 H, dd,  $J_{3',4'} = J_{3'',4''} = 4.0$  Hz, H-3', 3''), 3.69 (1 H, d,  $J_{4',5'} = J_{4'',5''} = 3.2$  Hz, H-4', 4''), 3.57 - 3.51 (6 H, m, H-5', 5'', 6', 6'') ppm;  $\delta_C$  (DMSO-*d*<sub>6</sub>, 100MHz): 143.42 (d,  $^4J_{F-C} = 2.3$  Hz, C-1), 115.86 (d,  $^3J_{F-C} = 9.7$  Hz, C-2), 104.22 (d,  $^2J_{F-C} = 26.8$  Hz, C-3), 155.05 (d,  $^1J_{F-C} = 232.9$  Hz, C-4), 108.18 (d,  $^2J_{F-C} = 22.3$  Hz, C-5), 145.77 (d,  $^3J_{F-C} = 10.4$  Hz, C-6), 102.82 (C-1'), 104.35 (C-1''), 70.34 (C-2'), 70.53 (C-2''), 72.62 (C-3'), 72.70 (C-3''), 68.13 (C-4'), 68.19 (C-4''), 75.78 (C-5'), 75.87 (C-5''), 60.48 (C-6'), 60.55 (C-6'') ppm.

Anal. Calcd. for C<sub>18</sub>H<sub>25</sub>O<sub>12</sub>F (%): C, 47.79, H, 5.57; Found: C, 47.75, H, 5.54.
